# Supplementary material
Source: Springer Nature journal article supplement (https://www.springermedizin.de/resource/supplementary/12888_2010_747_MOESM1_ESM.pdf/9478764)

**Secondary depressions excluded**

**116 suicides**

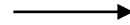

**100 suicides (primary depressions)**

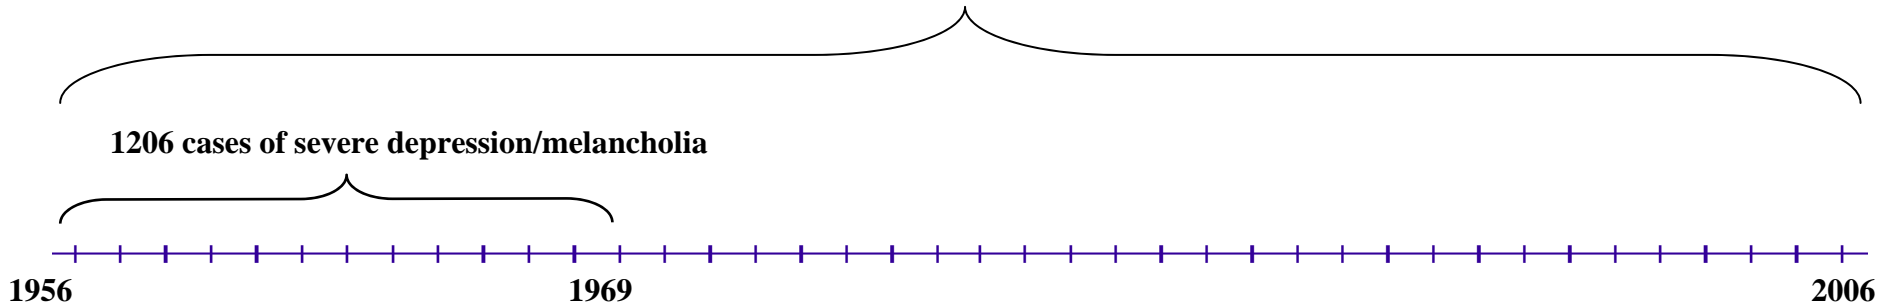

Supplement: MOESM1 [file 9478764]
